# Supplementary material for: Improving the performance of lead acetate-based perovskite solar cells via solvent vapor annealing
Source: Royal Society of Chemistry journal article supplement (doi:10.1039/c9ce00724e), 2019-01-01
Supplement: c9ce00724e1.pdf [file c9ce00724e1.pdf]

## Supporting Information

Improving performance of lead acetate-based perovskite solar cells via  
solvent vapor annealing control perovskite grain size

*Zhongli Guo, Jia Zhuang\*, Zhu Ma\*, Haoran Xia, Jing Yi, Weiya Zhou, Honglin Lu, Yan Xiang,  
Haimin Li*

*The Center of New Energy Materials and Technology, School of Materials Science and  
Engineering, Southwest Petroleum University, Chengdu 610500.P. R. China*

**Corresponding author:**

*Jia Zhuang (Tel: +86 13550396098; Fax: +86 02883033286; Email: [zj-656@163.com](mailto:zj-656@163.com))*

*Zhu Ma (Tel: +86 13880863057; Fax: +86 02883033286; Email: [deve198509@163.com](mailto:deve198509@163.com))*

## 1. Supporting Figures

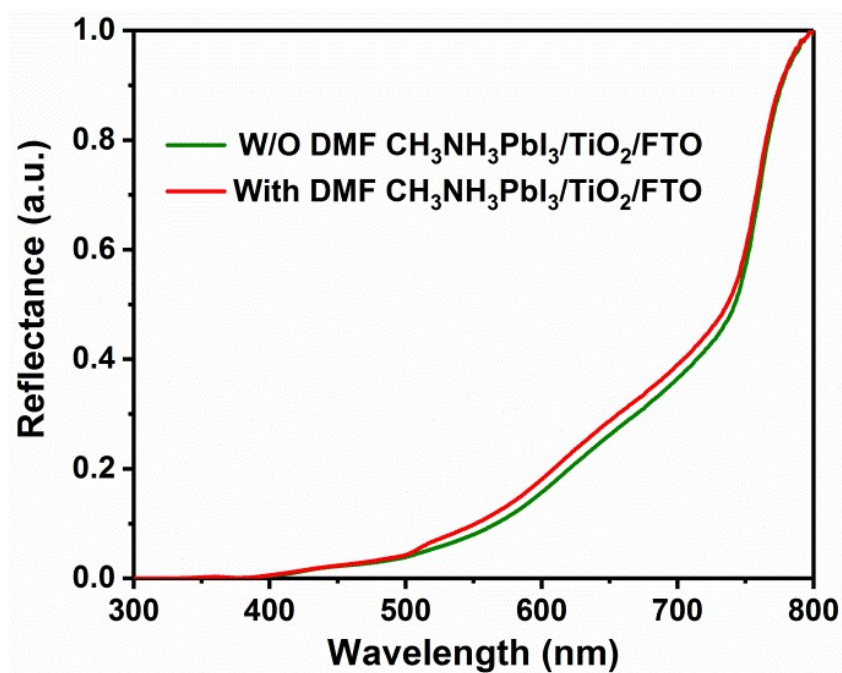

Fig. S1 UV-vis diffuses reflectance spectra of perovskite/TiO<sub>2</sub>/FTO (with and without DMF vapor treated) film.

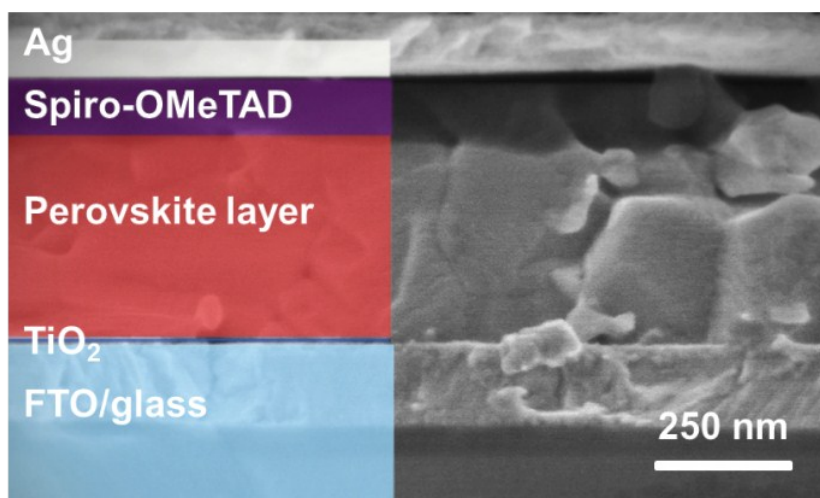

Fig.S2 Cross-sectional SEM image for the planar perovskite solar cell.

## 2. Supporting Tables

Table S1 Photovoltaic parameters of planar PSCs are prepared by DMF (15 $\mu$ L) solvent vapor annealing.

| Device number | Scan direction | Voc (V) | Jsc (mA/cm <sup>2</sup> ) | PCE (%) | FF (%) | H-index (%) |
|---------------|----------------|---------|---------------------------|---------|--------|-------------|
| 1             | Reverse        | 1.006   | 21.75                     | 13.57   | 62.00  | 1.7         |
|               | Forward        | 1.004   | 21.6                      | 13.33   | 61.50  |             |
| 2             | Reverse        | 1.011   | 21                        | 12.55   | 59.10  | 3.7         |
|               | Forward        | 0.992   | 20.69                     | 12.09   | 58.90  |             |
| 3             | Reverse        | 0.999   | 20.68                     | 11.73   | 56.80  | 2.9         |
|               | Forward        | 0.969   | 20.7                      | 11.61   | 57.90  |             |
| 4             | Reverse        | 0.998   | 21.24                     | 13.47   | 63.60  | 6.3         |
|               | Forward        | 0.993   | 20.79                     | 12.62   | 61.10  |             |
| 5             | Reverse        | 0.949   | 20.6                      | 11.99   | 61.30  | 4.3         |
|               | Forward        | 0.979   | 20.09                     | 11.48   | 58.40  |             |
| 6             | Reverse        | 0.981   | 19.63                     | 12.07   | 62.70  | 1.6         |
|               | Forward        | 0.994   | 18.99                     | 11.87   | 62.90  |             |
| 7             | Reverse        | 1.004   | 20.7                      | 13.24   | 63.70  | 1.5         |
|               | Forward        | 0.992   | 20.84                     | 13.04   | 63.10  |             |
| 8             | Reverse        | 0.93    | 20.68                     | 11.79   | 61.30  | 0.4         |
|               | Forward        | 0.984   | 19.84                     | 11.74   | 60.10  |             |
| 9             | Reverse        | 0.96    | 19.85                     | 11.95   | 62.70  | 0.9         |
|               | Forward        | 0.982   | 19.41                     | 11.84   | 62.10  |             |
| 10            | Reverse        | 0.955   | 20.26                     | 11.91   | 61.60  | 1.6         |
|               | Forward        | 0.972   | 19.95                     | 11.72   | 60.40  |             |
| 11            | Reverse        | 1.01    | 20.84                     | 12.43   | 59.10  | 6.8         |
|               | Forward        | 1.002   | 19.85                     | 11.58   | 58.20  |             |
| 12            | Reverse        | 1.012   | 20.8                      | 13.33   | 63.30  | 1.1         |
|               | Forward        | 1.012   | 20.29                     | 13.18   | 64.00  |             |

|    |         |       |       |       |       |     |
|----|---------|-------|-------|-------|-------|-----|
| 13 | Reverse | 0.969 | 20.74 | 12.36 | 61.50 | 5.2 |
|    | Forward | 0.992 | 19.86 | 11.71 | 59.40 |     |
| 14 | Reverse | 1.001 | 20.49 | 12.76 | 62.20 | 2.8 |
|    | Forward | 1.001 | 19.8  | 12.40 | 62.10 |     |
| 15 | Reverse | 1.002 | 20.02 | 12.44 | 62.00 | 5.8 |
|    | Forward | 0.995 | 19.64 | 11.72 | 60.00 |     |
| 16 | Reverse | 0.955 | 20.26 | 11.91 | 61.60 | 1.6 |
|    | Forward | 0.972 | 19.95 | 11.72 | 60.40 |     |
| 17 | Reverse | 1.01  | 20.84 | 12.43 | 59.10 | 6.8 |
|    | Forward | 1.002 | 19.85 | 11.58 | 58.20 |     |
| 18 | Reverse | 1.036 | 21.26 | 13.71 | 62.20 | 6.5 |
|    | Forward | 1.011 | 20.75 | 12.81 | 61.00 |     |
| 19 | Reverse | 1.029 | 20.36 | 13.20 | 63.00 | 2.9 |
|    | Forward | 1.012 | 20.17 | 12.82 | 62.80 |     |
| 20 | Reverse | 1.013 | 20.38 | 12.14 | 58.80 | 4.2 |
|    | Forward | 1.028 | 20.39 | 11.63 | 55.50 |     |

We use a hysteresis index “H-index” to show the hysteresis:  $H\text{-index} = (PCE_{\text{reverse}} - PCE_{\text{forward}}) / PCE_{\text{reverse}}$ .  $PCE_{\text{reverse}}$  and  $PCE_{\text{forward}}$  are power conversion efficiency from reverse and forward scan, respectively. The hysteresis for each condition was calculated and summarized in Table S1.

It is found that there is the phenomenon that the forward scan showed higher  $V_{oc}$  than that of reverse scan in these 20 devices. After investigating and analyzing the previous literature, the specific reasons for this phenomenon that the forward scan showed higher  $V_{oc}$  than that of reverse scan are as follows. This phenomenon is essentially a manifestation of the hysteresis effect. There are currently four accepted interpretations: (1) The dynamic slow process of the capacitor current was one important reason for hysteresis;<sup>1</sup> (2) ion movement caused by excessive ion deposition at the interface affect the hysteresis;<sup>2</sup> (3) charge transfer at the interfaces or internal defects of the material affect the hysteresis;<sup>3</sup> (4) Dipole

changes caused by material polarization and ferroelectricity affect the hysteresis.<sup>4</sup>

According to Rong and co-workers report, this such unique trends of tunable hysteresis are analyzed by considering the polarization of the TiO<sub>2</sub>/perovskite interface, which can attributed to accumulate positive charges reversibly<sup>5</sup>. Besides, from the report of You and co-workers, this phenomenon due to ion movement, charge transfer at the interfaces and imbalance charge transfer and hole accumulation at perovskite/hole transport layer.<sup>3</sup>

[1] A. A. Umar and M. Oyama, *Cryst. Growth Des.*, 2005, 5, 599-607.

[2] D. Yang, X. Zhou, R. Yang, Z. Yang, W. Yu, X. Wang, C. Li, S. Liu and R. P. H. Chang, *Energ. Environ. Sci.*, 2016, 9, 3071-3078.

[3] Q. Jiang, Z. Chu, P. Wang, X. Yang, H. Liu, Y. Wang, Z. Yin, J. Wu, X. Zhang and J. You, *Adv Mater.*, 2017, 29, 1703852.

[4] R. S. Sanchez, V. Gonzalez-Pedro, J. W. Lee, N. G. Park, Y. S. Kang, I. Mora-Sero and J. Bisquert, *J. Phys. Chem. Lett.*, 2014, 5, 2357-2363.

[5] Y. Rong, Y. Hu, S. Ravishankar, H. Liu, X. Hou, Y. Sheng, A. Mei, Q. Wang, D. Li, M. Xu, J. Bisquert and H. Han, *Energ. Environ. Sci.*, 2017, 10, 2383-2391.
